# Supplementary material for: Psychosocial Well-Being of Patients with Kidney Failure Receiving Haemodialysis during a Pandemic: A Survey
Source: MDPI journal article supplement (doi:10.3390/healthcare9081087), 2021-08-23
Supplement: s1 [file s1]

**Psychosocial Wellbeing of Patients Receiving Haemodialysis during a Pandemic: A Multi-Method Approach**
**Table S1.** Standardised measure of GHQ-12 with item and frequency breakdown.

| General Health Questionnaire-12 |                                  | Response frequencies |       |       |       |
|---------------------------------|----------------------------------|----------------------|-------|-------|-------|
|                                 |                                  | 0 ☺                  | 1     | 2     | 3 ☹   |
| 1                               | Able to concentrate              | 11.4%                | 31.8% | 34.1% | 22.7% |
| 2                               | Lost much sleep                  | 18.2%                | 40.9% | 34.1% | 6.8%  |
| 3                               | Playing a useful part            | 4.5%                 | 0.0%  | 72.8% | 22.7% |
| 4                               | Capable of making decisions      | 6.8%                 | 0.0%  | 75.0% | 18.2% |
| 5                               | Under stress                     | 4.5%                 | 54.6% | 31.8% | 9.1%  |
| 6                               | Could not overcome difficulties  | 25.0%                | 27.3% | 34.1% | 13.6% |
| 7                               | Enjoy your day-to-day activities | 4.5%                 | 29.5% | 31.9% | 34.1% |
| 8                               | Face up to problems              | 0.0%                 | 61.4% | 25.0% | 13.6% |
| 9                               | Feeling unhappy and depressed    | 22.7%                | 20.5% | 47.7% | 9.1%  |
| 10                              | Losing confidence                | 29.5%                | 31.8% | 20.5% | 18.2% |
| 11                              | Thinking of self as worthless    | 56.8%                | 20.5% | 9.1%  | 13.6% |
| 12                              | Feeling reasonably happy         | 4.5%                 | 59.2% | 22.7% | 13.6% |
